# Supplementary material for: A nitrogen budget for the Strait of Georgia, British Columbia, with emphasis on particulate nitrogen and dissolved inorganic nitrogen
Source: Copernicus journal article supplement (doi:10.5194/bg-10-7179-2013), 2013-11-12
Supplement: Supplementary file 1 [file bg-10-7179-2013-supplement.pdf]

1 Supplementary Table S1. Summary of collection details and the Sediment Accumulation Rate (SAR) for all sediment cores collected within  
2 the SoG for this study. Data not available = na.

3

| <b>Collection date</b> | <b>Location</b> | <b>Station</b> | <b>Longitude (°W)</b> | <b>Latitude (°N)</b> | <b>Water depth (m)</b> | <b>SAR (g cm<sup>-2</sup> yr<sup>-1</sup>)</b> |
|------------------------|-----------------|----------------|-----------------------|----------------------|------------------------|------------------------------------------------|
| 2003-06-19             | N               | GVRD 1         | 124.6                 | 49.6                 | 169                    | 0.08                                           |
| 2003-06-18             | S               | GVRD 2         | 123.3                 | 49.3                 | 76                     | 0.26                                           |
| 2002-12-19             | S               | GVRD 3         | 123.3                 | 49.2                 | 83                     | 1.30                                           |
| 2002-12-20             | S               | GVRD 4         | 123.3                 | 49.1                 | 84                     | na                                             |
| 2002-12-20             | S               | GVRD 5         | 123.5                 | 49.2                 | 388                    | 0.64                                           |
| 2003-06-18             | S               | GVRD 6         | 123.3                 | 48.9                 | 187                    | 2.70                                           |
| 2003-12-06             | S               | GVRD 7         | 123.4                 | 49.1                 | 233                    | 0.32                                           |
| 2007-07-08             | N               | GVRD 8         | 123.9                 | 49.4                 | 214                    | 0.10                                           |
| 2007-07-12             | N               | GVRD 9         | 124.1                 | 49.5                 | 365                    | 0.17                                           |
| 2007-07-09             | N               | GVRD 10        | 124.9                 | 49.8                 | 310                    | 0.05                                           |
| 2007-07-11             | N               | GVRD 11        | 124.6                 | 49.7                 | 336                    | 0.12                                           |
| 2007-07-11             | N               | GVRD 12        | 124.4                 | 49.4                 | 328                    | 0.12                                           |
| 2007-07-12             | N               | GVRD 13        | 124.2                 | 49.4                 | 326                    | 0.12                                           |
| 2007-07-13             | S               | GVRD 14        | 123.6                 | 49.4                 | 160                    | 0.23                                           |
| 2007-07-14             | S               | GVRD 15        | 123.5                 | 49.1                 | 296                    | 1.73                                           |
| 2007-11-06             | S               | GVRD 16        | 123.3                 | 49.0                 | 210                    | 0.98                                           |
| 2007-11-06             | N               | GVRD 17        | 124.0                 | 49.4                 | 410                    | 0.21                                           |
| 2007-11-29             | S               | GVRD 18        | 123.1                 | 48.9                 | 157                    | 0.30                                           |
| 2007-11-29             | S               | GVRD 20        | 123.8                 | 49.3                 | 365                    | 0.10                                           |
| 2007-12-01             | N               | GVRD 21        | 125.1                 | 50.0                 | 260                    | 0.11                                           |
| 2007-12-01             | N               | GVRD 22        | 124.2                 | 49.6                 | 373                    | 0.23                                           |

4 Supplementary Table S2. Summary of location details for river and sediment trap sampling  
 5 locations, as well as the locations of atmospheric, aquaculture, pulp mill, and wastewater  
 6 facility stations that provided N data for this study.

| <b>Sample Type</b>    | <b>Location</b>  | <b>Longitude (°W)</b> | <b>Latitude (°N)</b> |
|-----------------------|------------------|-----------------------|----------------------|
| River Station         | Campbell River   | 125.3                 | 50.0                 |
| River Station         | Englishman River | 124.3                 | 49.3                 |
| River Station         | Fraser River     | 123.1                 | 49.1                 |
| River Station         | Nanaimo River    | 123.9                 | 49.1                 |
| River Station         | Oyster River     | 125.1                 | 49.9                 |
| River Station         | Squamish River   | 123.2                 | 49.7                 |
| Sediment Trap Mooring | SOGS             | 123.4                 | 49.0                 |
| Sediment Trap Mooring | SOGN             | 124.9                 | 49.8                 |
| Atmospheric           | Campbell River   | 125.2                 | 50.0                 |
| Atmospheric           | Nanaimo          | 124.0                 | 49.2                 |
| Atmospheric           | Victoria         | 123.4                 | 48.4                 |
| Atmospheric           | Saturna          | 123.1                 | 48.8                 |
| Aquaculture           | AQ 137           | 125.2                 | 50.2                 |
| Aquaculture           | AQ 547           | 125.2                 | 50.2                 |
| Aquaculture           | AQ 138           | 125.2                 | 50.2                 |
| Aquaculture           | AQ 216           | 125.4                 | 50.2                 |
| Aquaculture           | AQ 1770          | 125.3                 | 50.1                 |
| Aquaculture           | AQ 221           | 123.9                 | 49.7                 |
| Aquaculture           | AQ 332           | 123.9                 | 49.6                 |
| Aquaculture           | AQ 408           | 123.8                 | 49.6                 |
| Aquaculture           | AQ 412           | 123.9                 | 49.6                 |
| Aquaculture           | AQ 746           | 123.9                 | 49.6                 |
| Aquaculture           | AQ 572           | 123.7                 | 49.6                 |
| Aquaculture           | AQ 304           | 125.0                 | 50.3                 |
| Aquaculture           | AQ 1698          | 124.1                 | 49.8                 |
| Aquaculture           | AQ 1697          | 124.1                 | 49.8                 |
| Pulp Mill             | PM1              | 124.5                 | 49.9                 |
| Pulp Mill             | PM2              | 123.2                 | 49.4                 |
| Pulp Mill             | PM3              | 122.9                 | 49.2                 |
| Pulp Mill             | PM4              | 124.0                 | 49.2                 |
| Pulp Mill             | PM5              | 123.1                 | 49.8                 |
| Pulp Mill             | PM6              | 123.7                 | 48.9                 |
| Wastewater facility   | W1               | 122.9                 | 49.2                 |
| Wastewater facility   | W2               | 123.2                 | 49.2                 |
| Wastewater facility   | W3               | 123.2                 | 49.3                 |
| Wastewater facility   | W4               | 122.8                 | 49.2                 |
| Wastewater facility   | W5               | 123.1                 | 49.1                 |

8 Supplementary Table S3. Nitrogen isotope composition of sediment cores both at the  
9 sediment-water (surface) and at the location determined to be where PN is buried.

| <b>Station</b> | <b>Location</b> | <b><math>\delta^{15}\text{N}</math><br/>(‰, surface)</b> | <b><math>\delta^{15}\text{N}</math><br/>(‰, buried)</b> |
|----------------|-----------------|----------------------------------------------------------|---------------------------------------------------------|
| GVRD 1         | N               | 6.4                                                      | 6.8                                                     |
| GVRD 2         | S               | 4.7                                                      | 4.6                                                     |
| GVRD 3         | S               | 2.1                                                      | 3.7                                                     |
| GVRD 4         | S               | 3.7                                                      | 3.4                                                     |
| GVRD 5         | S               | 6.0                                                      | 5.0                                                     |
| GVRD 6         | S               | 5.7                                                      | 5.6                                                     |
| GVRD 7         | S               | 5.6                                                      | 5.3                                                     |
| GVRD 8         | N               | 6.2                                                      | 6.5                                                     |
| GVRD 9         | N               | 7.0                                                      | 6.7                                                     |
| GVRD 10        | N               | 7.1                                                      | 7.1                                                     |
| GVRD 11        | N               | 7.1                                                      | 7.3                                                     |
| GVRD 12        | N               | 7.2                                                      | 7.5                                                     |
| GVRD 13        | N               | 7.0                                                      | 7.6                                                     |
| GVRD 14        | S               | 6.5                                                      | 6.1                                                     |
| GVRD 15        | S               | 5.8                                                      | 5.8                                                     |
| GVRD 16        | S               | 5.7                                                      | 5.7                                                     |
| GVRD 17        | N               | 6.9                                                      | 6.6                                                     |
| GVRD 18        | S               | 6.5                                                      | 5.9                                                     |
| GVRD 20        | S               | 6.1                                                      | 6.4                                                     |
| GVRD 21        | N               | 7.0                                                      | 7.3                                                     |
| GVRD 22        | N               | 6.7                                                      | 6.1                                                     |

10

11
